# Supplementary material for: Ab initio calculations on the ground and excited electronic states of neutral and charged palladium monoxide, PdO0,+,−
Source: Royal Society of Chemistry journal article supplement (doi:10.1039/c8cp01251b), 2018-01-01
Supplement: c8cp01251b1.pdf [file c8cp01251b1.pdf]

## Electronic Supplementary Information

### **Ab-initio calculations on the ground and excited electronic states of neutral and charged palladium monoxide, PdO<sup>0,+,-</sup>**

Nuno M.S. Almeida, Isuru R. Ariyaratna and Evangelos Miliordos\*

Department of Chemistry and Biochemistry, Auburn University, Auburn, AL 36849

\* To whom correspondence should be addressed. E-mail: [emiliord@auburn.edu](mailto:emiliord@auburn.edu)

**Table S1.** Bond length  $r_e$  (Å), harmonic vibrational frequencies  $\omega_e$  ( $\text{cm}^{-1}$ ),  $\Delta G_{1/2}$  ( $\text{cm}^{-1}$ ) value, and excitation energy  $T_e$  (eV) for the lowest electronic spin-orbit states of  $^{106}\text{Pd}^{16}\text{O}$  at MRCI, MRCI+Q, C-MRCI, and C-MRCI+Q.

| State           | MRCI  |            |                  |       | MRCI+Q |            |                  |       | C-MRCI |            |                  |       | C-MRCI+Q |            |                  |       |
|-----------------|-------|------------|------------------|-------|--------|------------|------------------|-------|--------|------------|------------------|-------|----------|------------|------------------|-------|
|                 | $r_e$ | $\omega_e$ | $\Delta G_{1/2}$ | $T_e$ | $r_e$  | $\omega_e$ | $\Delta G_{1/2}$ | $T_e$ | $r_e$  | $\omega_e$ | $\Delta G_{1/2}$ | $T_e$ | $r_e$    | $\omega_e$ | $\Delta G_{1/2}$ | $T_e$ |
| $X^3\Sigma_0^+$ | 1.838 | 620        | 610              | 0.000 | 1.824  | 654        | 643              | 0.000 | 1.833  | 623        | 613              | 0.000 | 1.815    | 671        | 658              | 0.000 |
| $X^3\Sigma_1^-$ | 1.836 | 625        | 614              | 0.011 | 1.823  | 658        | 647              | 0.012 | 1.831  | 629        | 618              | 0.010 | 1.814    | 675        | 662              | 0.009 |
| $1^3\Pi_2$      | 1.841 | 590        | 582              | 0.089 | 1.824  | 631        | 621              | 0.100 | 1.840  | 582        | 575              | 0.108 | 1.819    | 635        | 624              | 0.129 |
| $1^3\Pi_0^-$    | 1.848 | 583        | 576              | 0.164 | 1.830  | 623        | 614              | 0.176 | 1.847  | 576        | 569              | 0.187 | 1.825    | 627        | 617              | 0.211 |
| $1^3\Pi_1$      | 1.838 | 609        | 600              | 0.202 | 1.823  | 644        | 633              | 0.207 | 1.837  | 601        | 592              | 0.217 | 1.817    | 648        | 637              | 0.231 |
| $1^3\Pi_0^+$    | 1.839 | 615        | 606              | 0.224 | 1.826  | 642        | 631              | 0.227 | 1.838  | 607        | 599              | 0.236 | 1.821    | 653        | 642              | 0.245 |
| $1^1\Pi_1$      | 1.853 | 565        | 559              | 0.439 | 1.833  | 598        | 589              | 0.471 | 1.853  | 561        | 556              | 0.443 | 1.829    | 605        | 597              | 0.482 |
| $1^1\Delta_2$   | 1.869 | 569        | 562              | 0.635 | 1.853  | 584        | 575              | 0.681 | 1.863  | 574        | 566              | 0.595 | 1.841    | 607        | 597              | 0.635 |
| $1^1\Sigma_0^+$ | 1.835 | 526        | 523              | 0.829 | 1.796  | 785        | 739              | 0.760 | 1.881  | 494        | 494              | 0.853 | 1.825    | 520        | 517              | 0.879 |
| $2^1\Sigma_0^+$ | 1.868 | 691        | 680              | 1.031 | 1.889  | 686        | 677              | 0.976 | 1.841  | 711        | 698              | 1.077 | 1.845    | 731        | 716              | 1.008 |

**Table S2.** Potential energy data points for Figure 1 (kcal/mol).

| Distance (Å) | $X^3\Sigma^-$ | $1^3\Pi$ | $1^3\Phi$ | $2^3\Pi$ | $3^3\Pi$ | $1^3\Sigma^+$ |
|--------------|---------------|----------|-----------|----------|----------|---------------|
| 5.00         | 0.00          | 0.00     | 11.19     | 11.22    | 11.28    | 11.30         |
| 4.50         | -0.05         | -0.04    | 11.07     | 11.13    | 11.18    | 11.20         |
| 4.00         | -0.17         | -0.16    | 10.79     | 10.86    | 10.92    | 10.96         |
| 3.50         | -0.48         | -0.51    | 10.02     | 10.09    | 10.18    | 10.26         |
| 3.40         | -0.61         | -0.67    | 9.73      | 9.81     | 9.90     | 10.00         |
| 3.30         | -0.78         | -0.89    | 9.36      | 9.45     | 9.54     | 9.65          |
| 3.20         | -1.04         | -1.22    | 8.90      | 8.99     | 9.08     | 9.21          |
| 3.10         | -1.44         | -1.73    | 8.30      | 8.40     | 8.49     | 8.64          |
| 3.00         | -2.08         | -2.50    | 7.54      | 7.65     | 7.74     | 7.92          |
| 2.90         | -3.10         | -3.69    | 6.56      | 6.69     | 6.78     | 7.00          |
| 2.80         | -4.70         | -5.43    | 5.33      | 5.48     | 5.59     | 5.85          |
| 2.70         | -7.06         | -7.86    | 3.80      | 3.97     | 4.13     | 4.44          |
| 2.60         | -10.32        | -11.06   | 1.92      | 2.12     | 2.38     | 2.75          |
| 2.50         | -14.51        | -15.09   | -0.33     | -0.10    | 0.34     | 0.79          |
| 2.35         | -21.02        | -23.84   | -11.87    | -11.54   | -12.24   | -11.67        |
| 2.20         | -31.45        | -33.82   | -18.72    | -18.20   | -17.43   | -16.68        |
| 2.12         | -36.96        | -38.89   | -21.60    | -20.92   | -18.81   | -17.95        |
| 2.07         | -40.24        | -41.81   | -22.93    | -22.11   | -18.89   | -17.94        |
| 2.02         | -43.28        | -44.46   | -23.74    | -22.77   | -18.16   | -17.12        |
| 1.97         | -45.97        | -46.71   | -23.92    | -22.76   | -16.42   | -15.27        |
| 1.92         | -48.15        | -48.44   | -23.30    | -21.94   | -13.41   | -12.16        |
| 1.85         | -49.97        | -49.65   | -20.70    | -19.01   | -6.54    | -5.08         |
| 1.82         | -50.15        | -49.59   | -18.82    | -16.98   | -2.47    | -0.87         |
| 1.77         | -49.40        | -48.51   | -14.43    | -12.31   | 1.93     | 5.88          |
| 1.70         | -45.18        | -43.70   | -4.67     | -2.11    | 8.31     | 13.67         |
| 1.63         | -36.29        | -34.50   | 10.17     | 13.10    | 18.52    | 26.31         |
| 1.55         | -18.04        | -16.02   | 36.05     | 39.43    | 39.13    | 50.42         |
| 1.48         | 8.69          | 11.11    | 69.98     | 73.63    | 68.93    | 82.35         |
| 1.40         | 55.25         | 58.95    | 127.05    | 130.55   | 122.21   | 136.59        |
| 1.30         | 150.81        | 158.47   | 239.52    | 242.04   | 230.49   | 245.79        |
| 1.20         | 310.80        | 325.68   | 419.96    | 422.26   | 406.46   | 422.23        |

Table S2. (continued)

| Distance (Å) | 1 $^1\Pi$ | 1 $^1\Delta$ | 1 $^1\Sigma^+$ | 2 $^1\Sigma^+$ | 2 $^1\Pi$ | 1 $^1\Phi$ | 1 $^1\Sigma^-$ |
|--------------|-----------|--------------|----------------|----------------|-----------|------------|----------------|
| 5.00         | 10.88     | 10.96        | 10.98          | 11.33          | 10.95     | 10.91      | 10.97          |
| 4.50         | 10.70     | 10.79        | 10.82          | 11.38          | 10.77     | 10.75      | 10.80          |
| 4.00         | 10.20     | 10.31        | 10.35          | 11.56          | 10.28     | 10.26      | 10.32          |
| 3.50         | 8.75      | 8.90         | 8.99           | 12.18          | 8.88      | 8.81       | 8.90           |
| 3.00         | 3.56      | 4.38         | 4.64           | 14.35          | 4.57      | 4.65       | 4.39           |
| 2.80         | -1.42     | 0.07         | 0.56           | 16.54          | 0.74      | 0.84       | 0.38           |
| 2.70         | -5.17     | -3.23        | -2.53          | 18.33          | -2.08     | -1.98      | -2.57          |
| 2.60         | -9.96     | -7.52        | -6.52          | 20.78          | -5.63     | -5.51      | -6.24          |
| 2.50         | -15.61    | -12.66       | -11.25         | 12.04          | -9.71     | -9.57      | -10.43         |
| 2.35         | -24.82    | -21.19       | -18.95         | -2.49          | -16.02    | -15.83     | -16.65         |
| 2.20         | -34.09    | -29.93       | -26.60         | -15.82         | -21.56    | -21.27     | -21.52         |
| 2.12         | -38.64    | -33.83       | -30.01         | -24.70         | -23.09    | -22.67     | -22.84         |
| 2.07         | -40.97    | -36.06       | -31.90         | -27.94         | -23.85    | -23.34     | -22.81         |
| 2.02         | -43.08    | -38.06       | -33.65         | -30.71         | -24.13    | -23.52     | -22.07         |
| 1.97         | -44.82    | -39.68       | -35.35         | -32.70         | -23.74    | -23.01     | -20.38         |
| 1.92         | -46.07    | -40.76       | -36.95         | -33.62         | -22.49    | -21.60     | -17.48         |
| 1.85         | -46.64    | -41.00       | -38.25         | -33.12         | -18.85    | -17.68     | -10.81         |
| 1.82         | -46.33    | -40.50       | -38.22         | -32.21         | -16.45    | -15.13     | -6.78          |
| 1.77         | -44.83    | -38.61       | -37.05         | -29.58         | -11.07    | -9.45      | 1.81           |
| 1.70         | -39.13    | -32.87       | -30.72         | -22.45         | 0.54      | 2.72       | 16.55          |
| 1.63         | -29.72    | -22.76       | -20.60         | -11.13         | 17.13     | 20.02      | 26.30          |
| 1.55         | -10.78    | -3.17        | 0.04           | 9.89           | 45.24     | 49.14      | 46.47          |
| 1.50         | 7.35      | 15.06        | 19.66          | 29.15          | 69.44     | 74.12      | 66.15          |
| 1.45         | 32.04     | 39.40        | 45.93          | 54.86          | 100.32    | 105.93     | 93.04          |
| 1.40         | 65.16     | 71.51        | 80.20          | 89.22          | 139.64    | 145.29     | 128.95         |
| 1.35         | 109.01    | 113.48       | 123.94         | 135.09         | 189.55    | 195.15     | 176.04         |
| 1.30         | 166.50    | 168.00       | 179.59         | 195.51         | 252.48    | 258.57     | 236.79         |
| 1.25         | 240.62    | 238.22       | 250.37         | 273.10         | 331.52    | 339.22     | 314.49         |
| 1.20         | 335.69    | 328.33       | 340.69         | 371.84         | 429.77    | 441.32     | 412.76         |

**Table S2.** (continued)

| <b>Distance (Å)</b> | <b>1 <math>^5\Sigma^-</math></b> |
|---------------------|----------------------------------|
| 5.00                | 9.26                             |
| 4.50                | -2.08                            |
| 4.00                | 9.12                             |
| 3.50                | 9.04                             |
| 3.20                | 8.96                             |
| 3.00                | 8.83                             |
| 2.80                | 8.50                             |
| 2.50                | 6.83                             |
| 2.35                | 4.51                             |
| 2.20                | -0.07                            |
| 2.12                | -3.75                            |
| 2.07                | -6.52                            |
| 2.02                | -9.67                            |
| 1.97                | -13.22                           |
| 1.92                | -17.15                           |
| 1.85                | -20.11                           |
| 1.82                | -20.54                           |
| 1.77                | -20.24                           |
| 1.70                | -16.74                           |
| 1.63                | -8.03                            |
| 1.55                | 11.35                            |
| 1.50                | 30.55                            |
| 1.45                | 56.96                            |
| 1.40                | 92.41                            |
| 1.35                | 139.10                           |
| 1.30                | 199.62                           |
| 1.25                | 277.04                           |
| 1.20                | 375.01                           |

**Table S3.** Potential energy data points for Figure 3 (kcal/mol).

| Distance<br>(Å) | $X^3\Sigma_0^-$ | $X^3\Sigma_1^-$ | $1^3\Pi_2$ | $1^3\Pi_0^-$ | $1^3\Pi_1$ | $1^3\Pi_0^+$ | $1^1\Pi_1$ | $1^1\Delta_2$ | $1^1\Sigma_0^+$ | $2^1\Sigma_0^+$ |
|-----------------|-----------------|-----------------|------------|--------------|------------|--------------|------------|---------------|-----------------|-----------------|
| 1.40            | 105.17          | 105.31          | 107.68     | 110.94       | 109.83     | 111.29       | 119.15     | 122.97        | 130.59          | 139.47          |
| 1.42            | 91.29           | 91.40           | 93.63      | 96.84        | 95.85      | 97.24        | 104.78     | 109.10        | 116.12          | 124.70          |
| 1.45            | 73.18           | 73.25           | 75.38      | 78.49        | 77.68      | 78.96        | 86.09      | 90.96         | 97.09           | 105.52          |
| 1.47            | 62.73           | 62.78           | 64.89      | 67.93        | 67.23      | 68.45        | 75.34      | 80.46         | 86.03           | 94.49           |
| 1.50            | 49.18           | 49.23           | 51.36      | 54.31        | 53.75      | 54.88        | 61.46      | 66.83         | 71.65           | 80.21           |
| 1.52            | 41.44           | 41.48           | 43.66      | 46.54        | 46.06      | 47.13        | 53.55      | 59.00         | 63.41           | 72.01           |
| 1.55            | 31.51           | 31.56           | 33.83      | 36.61        | 36.24      | 37.23        | 43.45      | 48.91         | 52.86           | 61.44           |
| 1.58            | 23.37           | 23.43           | 25.82      | 28.50        | 28.23      | 29.13        | 35.20      | 40.58         | 44.26           | 52.67           |
| 1.63            | 13.16           | 13.25           | 15.84      | 18.35        | 18.22      | 18.99        | 24.90      | 29.98         | 33.57           | 41.36           |
| 1.67            | 7.50            | 7.62            | 10.34      | 12.72        | 12.69      | 13.37        | 19.18      | 23.95         | 27.73           | 34.75           |
| 1.70            | 4.46            | 4.60            | 7.40       | 9.67         | 9.73       | 10.33        | 16.09      | 20.61         | 24.65           | 30.97           |
| 1.73            | 2.30            | 2.46            | 5.30       | 7.47         | 7.63       | 8.16         | 13.86      | 18.12         | 22.51           | 28.03           |
| 1.77            | 0.59            | 0.77            | 3.63       | 5.66         | 5.95       | 6.38         | 12.00      | 15.96         | 20.89           | 25.25           |
| 1.82            | 0.00            | 0.21            | 2.98       | 4.86         | 5.32       | 5.67         | 11.13      | 14.74         | 20.28           | 23.45           |
| 1.85            | 0.30            | 0.54            | 3.20       | 5.00         | 5.57       | 5.88         | 11.21      | 14.66         | 20.36           | 23.25           |
| 1.87            | 0.71            | 0.97            | 3.54       | 5.29         | 5.94       | 6.24         | 11.45      | 14.81         | 20.53           | 23.44           |
| 1.92            | 2.32            | 2.62            | 4.93       | 6.57         | 7.42       | 7.70         | 12.58      | 15.78         | 21.33           | 24.81           |
| 1.97            | 4.52            | 4.86            | 6.87       | 8.42         | 9.46       | 9.75         | 14.26      | 17.38         | 22.60           | 27.10           |
| 2.00            | 6.03            | 6.40            | 8.23       | 9.74         | 10.89      | 11.20        | 15.47      | 18.56         | 23.55           | 28.79           |
| 2.02            | 8.79            | 9.19            | 10.75      | 12.22        | 13.52      | 13.87        | 17.76      | 20.81         | 25.40           | 31.98           |
| 2.07            | 11.76           | 12.21           | 13.52      | 14.95        | 16.38      | 16.79        | 20.34      | 23.33         | 27.55           | 35.49           |
| 2.12            | 14.88           | 15.36           | 16.47      | 17.88        | 19.40      | 19.88        | 23.15      | 26.04         | 29.91           | 39.22           |

**Table S4.** Potential energy data points for Figure 4 (kcal/mol).

| <b>Distance<br/>(Å)</b> | <b>X<sup>2</sup>Π</b> | <b>1<sup>4</sup>Σ<sup>-</sup></b> | <b>1<sup>4</sup>Π</b> | <b>1<sup>2</sup>Σ<sup>+</sup></b> | <b>1<sup>2</sup>Δ</b> | <b>2<sup>2</sup>Π</b> | <b>X<sup>3</sup>Σ<sup>-</sup></b> |
|-------------------------|-----------------------|-----------------------------------|-----------------------|-----------------------------------|-----------------------|-----------------------|-----------------------------------|
| <b>1.20</b>             | 374.49                | 403.79                            | 408.21                | 401.31                            | 404.58                | 411.72                | 385.51                            |
| <b>1.30</b>             | 209.74                | 238.47                            | 239.50                | 235.57                            | 240.58                | 246.94                | 225.43                            |
| <b>1.40</b>             | 108.69                | 134.34                            | 135.86                | 129.27                            | 139.11                | 144.52                | 130.59                            |
| <b>1.48</b>             | 59.15                 | 80.28                             | 83.10                 | 75.80                             | 87.35                 | 92.53                 | 83.00                             |
| <b>1.55</b>             | 31.76                 | 48.73                             | 52.23                 | 45.67                             | 57.17                 | 62.13                 | 55.93                             |
| <b>1.63</b>             | 13.15                 | 26.08                             | 29.65                 | 24.72                             | 35.24                 | 39.68                 | 36.70                             |
| <b>1.70</b>             | 4.50                  | 14.74                             | 17.90                 | 14.60                             | 23.99                 | 27.71                 | 27.21                             |
| <b>1.77</b>             | 0.67                  | 8.95                              | 11.39                 | 9.72                              | 17.94                 | 20.69                 | 22.58                             |
| <b>1.82</b>             | 0.00                  | 7.22                              | 9.02                  | 8.53                              | 15.90                 | 17.83                 | 21.44                             |
| <b>1.85</b>             | 0.21                  | 6.88                              | 8.28                  | 8.49                              | 15.35                 | 16.75                 | 21.41                             |
| <b>1.92</b>             | 1.96                  | 7.51                              | 7.98                  | 9.84                              | 15.49                 | 15.59                 | 22.81                             |
| <b>1.97</b>             | 3.96                  | 8.77                              | 8.62                  | 11.61                             | 16.43                 | 15.60                 | 24.75                             |
| <b>2.02</b>             | 6.18                  | 10.33                             | 9.59                  | 13.47                             | 17.91                 | 16.00                 | 27.24                             |
| <b>2.07</b>             | 8.93                  | 12.29                             | 11.02                 | 15.92                             | 19.61                 | 16.76                 | 30.13                             |
| <b>2.12</b>             | 12.17                 | 14.41                             | 12.69                 | 18.52                             | 21.52                 | 17.45                 | 33.30                             |
| <b>2.20</b>             | 17.59                 | 17.97                             | 15.65                 | 22.93                             | 25.45                 | 18.86                 | 38.75                             |
| <b>2.35</b>             | 26.17                 | 24.69                             | 22.19                 | 30.26                             | 30.26                 | 25.40                 | 49.39                             |
| <b>2.50</b>             | 33.28                 | 30.95                             | 27.93                 | 35.16                             | 35.16                 | 30.59                 | 59.81                             |

**Table S5.** Potential energy data points for Figure 5 (kcal/mol).

| Distance<br>(Å) | $X^4\Sigma^-$ | $1^2\Pi$ | $1^2\Sigma^-$ | $1^2\Delta$ | $2^2\Pi$ | $1^4\Delta$ | $1^4\Pi$ | $2^2\Delta$ | $1^2\Sigma^+$ |
|-----------------|---------------|----------|---------------|-------------|----------|-------------|----------|-------------|---------------|
| 7.00            | 0.05          | 0.05     | -0.01         | 0.00        | 0.37     | 0.00        | 0.05     | 0.43        | 0.43          |
| 6.00            | -0.16         | -0.16    | -0.22         | -0.20       | 0.40     | -0.19       | -0.16    | 0.45        | 0.46          |
| 5.00            | -0.60         | -0.61    | -0.69         | -0.61       | 0.42     | -0.61       | -0.60    | 0.47        | 0.49          |
| 4.70            | -0.84         | -0.84    | -0.93         | -0.83       | 0.42     | -0.82       | -0.84    | 0.47        | 0.49          |
| 4.50            | -1.04         | -1.04    | -1.14         | -1.01       | 0.41     | -1.01       | -1.04    | 0.46        | 0.49          |
| 4.40            | -1.15         | -1.16    | -1.27         | -1.12       | 0.41     | -1.11       | -1.15    | 0.46        | 0.49          |
| 4.30            | -1.29         | -1.29    | -1.41         | -1.24       | 0.40     | -1.23       | -1.29    | 0.45        | 0.49          |
| 4.20            | -1.43         | -1.44    | -1.57         | -1.37       | 0.39     | -1.37       | -1.43    | 0.44        | 0.48          |
| 4.10            | -1.60         | -1.60    | -1.75         | -1.53       | 0.38     | -1.52       | -1.60    | 0.43        | 0.47          |
| 4.00            | -1.78         | -1.79    | -1.96         | -1.70       | 0.36     | -1.69       | -1.78    | 0.41        | 0.46          |
| 3.95            | -1.89         | -1.89    | -2.07         | -1.79       | 0.35     | -1.78       | -1.89    | 0.40        | 0.46          |
| 3.90            | -2.00         | -2.00    | -2.19         | -1.89       | 0.34     | -1.88       | -2.00    | 0.39        | 0.45          |
| 3.85            | -2.11         | -2.12    | -2.32         | -1.99       | 0.33     | -1.99       | -2.11    | 0.37        | 0.44          |
| 3.80            | -2.23         | -2.24    | -2.46         | -2.11       | 0.31     | -2.10       | -2.23    | 0.36        | 0.43          |
| 3.75            | -2.36         | -2.37    | -2.61         | -2.23       | 0.29     | -2.22       | -2.36    | 0.34        | 0.42          |
| 3.70            | -2.50         | -2.51    | -2.77         | -2.35       | 0.26     | -2.34       | -2.50    | 0.32        | 0.41          |
| 3.65            | -2.65         | -2.66    | -2.94         | -2.49       | 0.23     | -2.48       | -2.65    | 0.31        | 0.40          |
| 3.60            | -2.81         | -2.82    | -3.12         | -2.64       | 0.20     | -2.62       | -2.81    | 0.28        | 0.38          |
| 3.55            | -2.98         | -2.99    | -3.32         | -2.79       | 0.16     | -2.78       | -2.98    | 0.26        | 0.37          |
| 3.50            | -3.15         | -3.17    | -3.53         | -2.95       | 0.11     | -2.94       | -3.15    | 0.24        | 0.35          |
| 3.45            | -3.34         | -3.36    | -3.76         | -3.13       | 0.06     | -3.11       | -3.34    | 0.21        | 0.33          |
| 3.40            | -3.54         | -3.57    | -4.00         | -3.32       | 0.00     | -3.30       | -3.54    | 0.18        | 0.31          |
| 3.35            | -3.75         | -3.79    | -4.26         | -3.51       | -0.07    | -3.49       | -3.75    | 0.15        | 0.29          |
| 3.30            | -3.98         | -4.02    | -4.54         | -3.72       | -0.14    | -3.70       | -3.98    | 0.12        | 0.27          |
| 3.25            | -4.21         | -4.26    | -4.84         | -3.95       | -0.23    | -3.92       | -4.21    | 0.08        | 0.25          |
| 3.20            | -4.46         | -4.52    | -5.16         | -4.18       | -0.34    | -4.16       | -4.46    | 0.05        | 0.23          |
| 3.15            | -4.72         | -4.79    | -5.51         | -4.43       | -0.46    | -4.40       | -4.72    | 0.01        | 0.21          |
| 3.10            | -4.99         | -5.07    | -5.88         | -4.69       | -0.59    | -4.66       | -4.99    | -0.03       | 0.19          |
| 3.05            | -5.27         | -5.37    | -6.27         | -4.96       | -0.75    | -4.93       | -5.27    | -0.06       | 0.17          |
| 3.00            | -5.55         | -5.68    | -6.69         | -5.25       | -0.92    | -5.22       | -5.55    | -0.10       | 0.16          |
| 2.95            | -5.85         | -6.00    | -7.14         | -5.54       | -1.13    | -5.51       | -5.85    | -0.13       | 0.15          |
| 2.90            | -6.14         | -6.33    | -7.61         | -5.85       | -1.36    | -5.82       | -6.14    | -0.15       | 0.14          |
| 2.85            | -6.44         | -6.66    | -8.11         | -6.16       | -1.62    | -6.13       | -6.44    | -0.17       | 0.14          |
| 2.80            | -6.73         | -7.00    | -8.64         | -6.47       | -1.92    | -6.45       | -6.73    | -0.18       | 0.15          |
| 2.75            | -7.01         | -7.35    | -9.19         | -6.78       | -2.27    | -6.77       | -7.01    | -0.18       | 0.17          |
| 2.70            | -7.27         | -7.68    | -9.77         | -7.09       | -2.66    | -7.09       | -7.27    | -0.18       | 0.21          |
| 2.65            | -7.50         | -8.01    | -10.37        | -7.38       | -3.11    | -7.40       | -7.50    | -0.19       | 0.26          |
| 2.60            | -7.69         | -8.33    | -10.99        | -7.66       | -3.62    | -7.71       | -7.69    | -0.20       | 0.34          |
| 2.55            | -7.82         | -8.63    | -11.63        | -7.91       | -4.20    | -8.00       | -7.82    | -0.20       | 0.43          |
| 2.50            | -7.89         | -8.90    | -12.29        | -8.12       | -4.87    | -8.27       | -7.89    | -0.21       | 0.55          |
| 2.45            | -7.86         | -9.14    | -12.98        | -8.29       | -5.62    | -8.51       | -7.86    | -0.23       | 0.69          |
| 2.40            | -7.74         | -9.37    | -13.69        | -8.40       | -6.48    | -8.74       | -7.74    | -0.28       | 0.84          |



|             |        |        |        |        |        |        |        |        |        |
|-------------|--------|--------|--------|--------|--------|--------|--------|--------|--------|
| <b>2.35</b> | -7.48  | -9.60  | -14.43 | -8.45  | -7.42  | -8.94  | -7.48  | -0.39  | 1.00   |
| <b>2.30</b> | -7.08  | -9.92  | -15.24 | -8.41  | -8.39  | -9.12  | -7.08  | -0.60  | 1.16   |
| <b>2.25</b> | -6.49  | -10.61 | -16.12 | -8.25  | -9.10  | -9.26  | -6.49  | -0.97  | 1.30   |
| <b>2.15</b> | -4.22  | -13.28 | -17.73 | -7.10  | -9.23  | -8.91  | -4.22  | -2.37  | 1.39   |
| <b>2.10</b> | -2.44  | -15.03 | -18.48 | -6.09  | -8.93  | -8.43  | -2.44  | -3.54  | 1.16   |
| <b>2.05</b> | -0.49  | -16.95 | -19.27 | -5.47  | -8.56  | -7.74  | -0.49  | -4.32  | 0.69   |
| <b>2.00</b> | -0.14  | -18.95 | -20.10 | -7.12  | -8.13  | -6.76  | -0.14  | -2.67  | -0.08  |
| <b>1.95</b> | 0.30   | -20.95 | -20.92 | -9.11  | -7.65  | -5.38  | 0.30   | -0.28  | -1.09  |
| <b>1.90</b> | 1.13   | -22.80 | -21.62 | -11.01 | -7.05  | -3.43  | 1.13   | 2.85   | -2.18  |
| <b>1.85</b> | 2.62   | -24.28 | -22.00 | -12.51 | -6.14  | -0.66  | 2.62   | 6.93   | -3.01  |
| <b>1.80</b> | 5.14   | -25.11 | -21.77 | -13.22 | -4.57  | 3.27   | 5.14   | 12.26  | -3.16  |
| <b>1.75</b> | 9.19   | -24.88 | -20.53 | -12.67 | -1.89  | 8.84   | 9.19   | 19.24  | -2.10  |
| <b>1.70</b> | 15.30  | -23.12 | -17.80 | -10.35 | 2.46   | 16.57  | 15.30  | 28.38  | 0.70   |
| <b>1.65</b> | 24.12  | -19.23 | -12.96 | -5.68  | 9.15   | 27.13  | 24.12  | 40.32  | 5.85   |
| <b>1.60</b> | 36.37  | -12.41 | -5.27  | 2.09   | 18.94  | 41.24  | 36.37  | 55.78  | 14.08  |
| <b>1.55</b> | 52.86  | -1.91  | 6.23   | 13.72  | 32.89  | 60.02  | 52.86  | 75.92  | 26.19  |
| <b>1.50</b> | 74.96  | 13.79  | 22.51  | 30.32  | 51.79  | 84.31  | 74.96  | 101.43 | 43.29  |
| <b>1.40</b> | 141.36 | 66.65  | 75.49  | 83.90  | 110.20 | 155.35 | 141.36 | 162.96 | 97.85  |
| <b>1.30</b> | 252.68 | 163.90 | 170.51 | 178.68 | 208.18 | 262.03 | 252.68 | 273.87 | 193.60 |

---

**Table S6.** Potential energy data points for Figure 6 (kcal/mol).

| Distance<br>(Å) | $X^4\Sigma^-_{1/2}$ | $X^4\Sigma^-_{3/2}$ | $1^2\Pi_{3/2}$ | $1^2\Pi_{1/2}$ | $1^2\Sigma^-_{1/2}$ | $1^2\Delta_{3/2}$ | $1^2\Delta_{5/2}$ |
|-----------------|---------------------|---------------------|----------------|----------------|---------------------|-------------------|-------------------|
| 7.00            | 0.00                | 0.00                | 0.01           | 0.00           | 0.01                | 0.01              | 0.04              |
| 6.00            | -0.21               | -0.21               | -0.19          | -0.21          | -0.19               | -0.19             | -0.17             |
| 5.00            | -0.67               | -0.67               | -0.62          | -0.67          | -0.62               | -0.62             | -0.59             |
| 4.70            | -0.91               | -0.91               | -0.85          | -0.91          | -0.85               | -0.85             | -0.81             |
| 4.50            | -1.12               | -1.12               | -1.05          | -1.12          | -1.05               | -1.05             | -1.00             |
| 4.40            | -1.25               | -1.25               | -1.16          | -1.25          | -1.16               | -1.16             | -1.11             |
| 4.30            | -1.39               | -1.39               | -1.29          | -1.38          | -1.29               | -1.29             | -1.23             |
| 4.20            | -1.54               | -1.54               | -1.44          | -1.54          | -1.44               | -1.44             | -1.36             |
| 4.10            | -1.72               | -1.72               | -1.60          | -1.71          | -1.60               | -1.60             | -1.51             |
| 4.00            | -1.92               | -1.92               | -1.79          | -1.91          | -1.79               | -1.79             | -1.69             |
| 3.95            | -2.04               | -2.04               | -1.89          | -2.02          | -1.89               | -1.89             | -1.78             |
| 3.90            | -2.16               | -2.15               | -2.00          | -2.14          | -1.99               | -1.99             | -1.88             |
| 3.85            | -2.28               | -2.28               | -2.11          | -2.26          | -2.11               | -2.11             | -1.99             |
| 3.80            | -2.42               | -2.42               | -2.23          | -2.40          | -2.23               | -2.23             | -2.10             |
| 3.75            | -2.57               | -2.57               | -2.36          | -2.54          | -2.36               | -2.36             | -2.22             |
| 3.70            | -2.72               | -2.72               | -2.50          | -2.69          | -2.50               | -2.49             | -2.35             |
| 3.65            | -2.89               | -2.89               | -2.65          | -2.85          | -2.64               | -2.64             | -2.48             |
| 3.60            | -3.08               | -3.07               | -2.80          | -3.03          | -2.80               | -2.80             | -2.63             |
| 3.55            | -3.27               | -3.27               | -2.97          | -3.21          | -2.96               | -2.96             | -2.78             |
| 3.50            | -3.48               | -3.48               | -3.14          | -3.41          | -3.14               | -3.14             | -2.95             |
| 3.45            | -3.71               | -3.70               | -3.33          | -3.63          | -3.33               | -3.32             | -3.12             |
| 3.40            | -3.95               | -3.95               | -3.53          | -3.86          | -3.53               | -3.52             | -3.31             |
| 3.35            | -4.21               | -4.21               | -3.74          | -4.10          | -3.74               | -3.73             | -3.51             |
| 3.30            | -4.49               | -4.49               | -3.97          | -4.36          | -3.96               | -3.95             | -3.72             |
| 3.25            | -4.80               | -4.79               | -4.21          | -4.64          | -4.20               | -4.18             | -3.94             |
| 3.20            | -5.12               | -5.11               | -4.46          | -4.94          | -4.44               | -4.43             | -4.18             |
| 3.15            | -5.47               | -5.46               | -4.72          | -5.25          | -4.70               | -4.69             | -4.42             |
| 3.10            | -5.85               | -5.84               | -5.00          | -5.59          | -4.98               | -4.96             | -4.68             |
| 3.05            | -6.25               | -6.24               | -5.29          | -5.94          | -5.26               | -5.24             | -4.96             |
| 3.00            | -6.69               | -6.67               | -5.58          | -6.32          | -5.55               | -5.52             | -5.24             |
| 2.95            | -7.15               | -7.13               | -5.89          | -6.72          | -5.86               | -5.82             | -5.54             |
| 2.90            | -7.65               | -7.63               | -6.21          | -7.13          | -6.16               | -6.12             | -5.84             |
| 2.85            | -8.19               | -8.16               | -6.53          | -7.57          | -6.47               | -6.41             | -6.16             |
| 2.80            | -8.77               | -8.73               | -6.86          | -8.02          | -6.78               | -6.71             | -6.47             |
| 2.75            | -9.39               | -9.35               | -7.18          | -8.50          | -7.09               | -6.99             | -6.79             |
| 2.70            | -10.05              | -10.01              | -7.49          | -8.98          | -7.38               | -7.26             | -7.10             |
| 2.65            | -10.77              | -10.72              | -7.79          | -9.48          | -7.65               | -7.51             | -7.41             |
| 2.60            | -11.55              | -11.49              | -8.07          | -9.99          | -7.90               | -7.72             | -7.72             |
| 2.55            | -12.40              | -12.33              | -8.33          | -10.51         | -8.11               | -8.01             | -7.98             |
| 2.50            | -13.33              | -13.25              | -8.55          | -11.04         | -8.28               | -8.28             | -8.23             |
| 2.45            | -14.36              | -14.27              | -8.73          | -11.58         | -8.53               | -8.47             | -8.42             |
| 2.40            | -15.52              | -15.42              | -8.88          | -12.13         | -8.75               | -8.66             | -8.57             |

|             |        |        |         |         |         |         |         |
|-------------|--------|--------|---------|---------|---------|---------|---------|
| <b>2.35</b> | -16.83 | -16.73 | -9.00   | -12.71  | -8.95   | -8.82   | -8.68   |
| <b>2.30</b> | -18.34 | -18.22 | -9.16   | -13.34  | -9.10   | -8.94   | -8.76   |
| <b>2.25</b> | -20.08 | -19.95 | -9.31   | -14.04  | -9.27   | -9.00   | -8.83   |
| <b>2.15</b> | -23.81 | -23.66 | -10.67  | -15.30  | -10.65  | -8.96   | -8.47   |
| <b>2.10</b> | -25.79 | -25.63 | -12.24  | -15.88  | -12.17  | -8.49   | -7.89   |
| <b>2.05</b> | -27.88 | -27.70 | -14.03  | -16.51  | -13.90  | -7.82   | -7.23   |
| <b>2.00</b> | -29.99 | -29.79 | -15.95  | -17.21  | -15.75  | -6.86   | -6.65   |
| <b>1.95</b> | -32.01 | -31.80 | -17.90  | -17.96  | -17.56  | -7.05   | -6.01   |
| <b>1.90</b> | -33.77 | -33.54 | -19.72  | -19.38  | -18.45  | -8.52   | -7.60   |
| <b>1.85</b> | -35.04 | -34.78 | -21.20  | -20.73  | -18.77  | -9.79   | -9.05   |
| <b>1.80</b> | -35.49 | -35.21 | -22.04  | -21.41  | -18.48  | -10.33  | -9.73   |
| <b>1.75</b> | -34.72 | -34.41 | -21.83  | -21.02  | -17.20  | -9.65   | -9.17   |
| <b>1.70</b> | -32.27 | -31.92 | -20.08  | -19.08  | -14.41  | -7.22   | -6.83   |
| <b>1.65</b> | -27.55 | -27.16 | -16.18  | -14.99  | -9.53   | -2.45   | -2.14   |
| <b>1.60</b> | -19.82 | -19.38 | -9.34   | -7.94   | -1.77   | 5.38    | 5.67    |
| <b>1.55</b> | -8.20  | -7.71  | 1.21    | 2.79    | 9.80    | 17.12   | 17.37   |
| <b>1.50</b> | 8.36   | 8.88   | 16.97   | 18.74   | 26.17   | 33.84   | 34.07   |
| <b>1.40</b> | 62.07  | 62.50  | 69.77   | 72.13   | 79.40   | 87.72   | 87.93   |
| <b>1.30</b> | 156.62 | 156.64 | 166.86  | 170.02  | 174.84  | 182.92  | 183.09  |
| <b>1.20</b> | 313.96 | 314.17 | 333.22  | 334.04  | 336.96  | 340.87  | 341.05  |
| <b>1.10</b> | 570.62 | 570.95 | 595.33  | 598.74  | 598.92  | 603.20  | 605.37  |
| <b>1.00</b> | 990.93 | 991.32 | 1016.95 | 1020.29 | 1020.62 | 1020.96 | 1023.38 |

---
